# Supplementary material for: Diurnal regulation of photosynthetic light absorption, electron transport and carbon fixation in two contrasting oceanic environments
Source: Copernicus journal article supplement (doi:10.5194/bg-16-1381-2019), 2019-04-04
Supplement: Supplementary file 1 [file bg-16-1381-2019-supplement.zip]

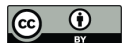

## *Supplement of*

# **Diurnal regulation of photosynthetic light absorption, electron transport and carbon fixation in two contrasting oceanic environments**

**Nina Schuback and Philippe D. Tortell**

*Correspondence to:* Nina Schuback ([schuback.nina@gmail.com](mailto:schuback.nina@gmail.com))

- [bg-16-1381-2019-supplement-title-page.pdf](#)
- [supplements\\_final](#)
  - [S1.pdf](#)
  - [S2.pdf](#)
  - [S3.pdf](#)

The copyright of individual parts of the supplement might differ from the CC BY 4.0 License.
